# Supplementary material
Source: MDPI journal article supplement (https://www.mdpi.com/search?q=molecules-24-01277)
Supplement: s001 [file molecules-24-01277-s001.pdf]

**Table S1.** Results of the two-way ANOVA performed to compare the statistical significance of wine type and individual differences obtained in each of the nasal cavity parameters extracted from the in vivo release curves.

|                        | Time (min) | Wine type |        |        |         | Interindividual differences |        |        |        |        |        |        |        |        | p-value |
|------------------------|------------|-----------|--------|--------|---------|-----------------------------|--------|--------|--------|--------|--------|--------|--------|--------|---------|
|                        |            | WC        | WE     | WP     | p-value | S1                          | S2     | S3     | S4     | S5     | S6     | S7     | S8     | S9     |         |
| <b>Isoamyl acetate</b> |            |           |        |        |         |                             |        |        |        |        |        |        |        |        |         |
| Imax                   | 1          | 7260      | 10724  | 8268   | 0.311   | 4145                        | 11028  | 16979  | 3016   | 1310   | 14286  | 2086   | 5129   | 20778  | 0.001   |
|                        | 2          | 1101      | 1386   | 1326   | 0.744   | 929                         | 1307   | 1309   | 272    | 954    | 2178   | 242    | 1531   | 2721   | 0.059   |
|                        | 3          | 577       | 611    | 718    | 0.799   | 335                         | 525    | 647    | 149    | 368    | 1292   | 124    | 926    | 1353   | 0.054   |
|                        | 4          | 232       | 312    | 317    | 0.458   | 174                         | 185    | 590    | 71     | 111    | 520    | 84     | 307    | 539    | 0.004   |
| AUC                    | 1          | 186267    | 211798 | 210533 | 0.824   | 119092                      | 230907 | 353566 | 62019  | 43325  | 411897 | 47142  | 169262 | 388585 | 0.001   |
|                        | 2          | 33504     | 34522  | 35062  | 0.971   | 27585                       | 39391  | 53064  | 9005   | 25977  | 54698  | 5492   | 46622  | 47432  | 0.005   |
|                        | 3          | 15823     | 17486  | 21929  | 0.527   | 14175                       | 17382  | 30270  | 4126   | 10960  | 30025  | 3163   | 28303  | 27308  | 0.069   |
|                        | 4          | 6919      | 9299   | 10844  | 0.343   | 7275                        | 6736   | 19597  | 1971   | 4638   | 13061  | 1470   | 14779  | 10896  | 0.018   |
|                        | Total      | 241593    | 273105 | 278368 | 0.772   | 168127                      | 294416 | 456496 | 77121  | 82902  | 509681 | 57268  | 258966 | 474221 | 0.001   |
| % of release           | 1          | 74        | 74     | 75     | 0.922   | 71                          | 79     | 75     | 80     | 54     | 80     | 82     | 63     | 82     | 0.002   |
|                        | 2          | 17        | 15     | 14     | 0.364   | 17                          | 13     | 13     | 12     | 31     | 11     | 10     | 20     | 10     | 0.000   |
|                        | 3          | 7         | 7      | 8      | 0.898   | 8                           | 6      | 8      | 5      | 13     | 6      | 6      | 11     | 6      | 0.038   |
|                        | 4          | 3         | 4      | 4      | 0.658   | 4                           | 2      | 4      | 3      | 5      | 3      | 3      | 6      | 2      | 0.066   |
| T25                    | 4          | 4         | 4      | 0.450  | 4       | 3                           | 5      | 7      | 2      | 5      | 3      | 3      | 7      | 0.543  |         |
| T50                    | 15         | 14        | 15     | 0.977  | 22      | 8                           | 18     | 13     | 5      | 29     | 10     | 9      | 19     | 0.131  |         |
| T75                    | 36         | 34        | 38     | 0.516  | 46      | 37                          | 46     | 33     | 15     | 45     | 36     | 30     | 39     | 0.016  |         |
| T80                    | 41         | 40        | 46     | 0.506  | 60      | 42                          | 52     | 39     | 21     | 48     | 38     | 39     | 44     | 0.036  |         |
| T90                    | 72         | 68        | 78     | 0.579  | 92      | 59                          | 84     | 65     | 57     | 92     | 48     | 83     | 75     | 0.227  |         |
| T95                    | 108        | 107       | 122    | 0.445  | 135     | 99                          | 135    | 96     | 97     | 136    | 92     | 115    | 109    | 0.304  |         |
| Slope                  | 409        | 442       | 485    | 0.575  | 290     | 486                         | 800    | 143    | 319    | 639    | 92     | 667    | 570    | 0.000  |         |
| <b>Ethyl hexanoate</b> |            |           |        |        |         |                             |        |        |        |        |        |        |        |        |         |
| Imax                   | 1          | 9729      | 13392  | 10746  | 0.379   | 7474                        | 13370  | 15306  | 5492   | 2455   | 19308  | 2944   | 8622   | 26630  | 0.002   |
|                        | 2          | 1900      | 2200   | 2033   | 0.879   | 1805                        | 1812   | 1162   | 404    | 2222   | 3832   | 287    | 2656   | 4220   | 0.029   |
|                        | 3          | 1000      | 1121   | 1186   | 0.910   | 704                         | 927    | 730    | 217    | 911    | 2286   | 150    | 1823   | 2172   | 0.131   |
|                        | 4          | 387       | 508    | 573    | 0.491   | 340                         | 295    | 758    | 111    | 226    | 952    | 122    | 714    | 884    | 0.040   |
| AUC                    | 1          | 324890    | 350894 | 319831 | 0.899   | 249348                      | 342337 | 396553 | 132583 | 99899  | 713360 | 85345  | 325216 | 642204 | 0.002   |
|                        | 2          | 71289     | 74428  | 64905  | 0.740   | 69072                       | 68814  | 77419  | 20990  | 66530  | 122149 | 9946   | 96815  | 100130 | 0.004   |
|                        | 3          | 37426     | 43700  | 45030  | 0.768   | 38869                       | 38809  | 52660  | 11844  | 32935  | 73726  | 7345   | 63770  | 58511  | 0.070   |
|                        | 4          | 17952     | 25106  | 24864  | 0.371   | 21289                       | 18863  | 38532  | 6274   | 12017  | 35458  | 3878   | 39251  | 28207  | 0.015   |
|                        | Total      | 451557    | 494128 | 454630 | 0.881   | 378577                      | 468823 | 565164 | 171691 | 211381 | 944693 | 106514 | 525052 | 829052 | 0.002   |
| % of release           | 1          | 69        | 69     | 71     | 0.642   | 66                          | 74     | 68     | 77     | 49     | 75     | 80     | 60     | 78     | 0.000   |
|                        | 2          | 18        | 16     | 15     | 0.142   | 19                          | 14     | 15     | 12     | 31     | 13     | 9      | 21     | 12     | < 0.001 |
|                        | 3          | 9         | 10     | 9      | 0.907   | 10                          | 8      | 10     | 7      | 15     | 8      | 7      | 12     | 7      | 0.045   |
|                        | 4          | 4         | 5      | 5      | 0.145   | 6                           | 4      | 7      | 4      | 5      | 4      | 4      | 7      | 3      | 0.009   |
| <b>Ethyl decanoate</b> |            |           |        |        |         |                             |        |        |        |        |        |        |        |        |         |
| Imax                   | 1          | 514       | 673    | 643    | 0.103   | 558                         | 675    | 724    | 472    | 557    | 868    | 147    | 634    | 855    | 0.002   |
|                        | 2          | 183       | 209    | 208    | 0.212   | 229                         | 194    | 242    | 161    | 175    | 302    | 65     | 207    | 227    | < 0.001 |
|                        | 3          | 133       | 138    | 151    | 0.516   | 165                         | 127    | 178    | 108    | 130    | 230    | 47     | 140    | 142    | 0.002   |
|                        | 4          | 99        | 114    | 127    | 0.104   | 128                         | 99     | 149    | 88     | 95     | 170    | 45     | 137    | 109    | 0.001   |
| AUC                    | 1          | 95615     | 138813 | 134301 | 0.029   | 118055                      | 134755 | 156658 | 97361  | 108643 | 194947 | 20818  | 121877 | 153069 | 0.001   |
|                        | 2          | 35368     | 45831  | 45110  | 0.070   | 48545                       | 40073  | 58200  | 30545  | 37745  | 69284  | 6638   | 40597  | 47300  | 0.000   |
|                        | 3          | 22493     | 26647  | 28736  | 0.216   | 30644                       | 23409  | 38029  | 17122  | 21903  | 45631  | 3976   | 25840  | 27074  | 0.000   |
|                        | 4          | 14216     | 18523  | 20567  | 0.041   | 21014                       | 14456  | 28483  | 10834  | 12909  | 30777  | 2859   | 21116  | 17470  | 0.000   |
|                        | Total      | 167691    | 229814 | 228714 | 0.031   | 218257                      | 212693 | 281370 | 155863 | 181199 | 340640 | 34292  | 209430 | 244913 | 0.000   |
| % of release           | 1          | 58        | 60     | 59     | 0.501   | 55                          | 63     | 55     | 61     | 59     | 57     | 62     | 58     | 63     | 0.183   |
|                        | 2          | 21        | 20     | 20     | 0.685   | 22                          | 19     | 21     | 20     | 21     | 20     | 18     | 20     | 19     | 0.448   |
|                        | 3          | 13        | 12     | 13     | 0.383   | 14                          | 11     | 14     | 12     | 13     | 13     | 11     | 12     | 11     | 0.530   |
|                        | 4          | 8         | 8      | 9      | 0.321   | 9                           | 7      | 10     | 8      | 7      | 9      | 8      | 10     | 7      | 0.081   |
| T25                    | 13         | 12        | 12     | 0.419  | 13      | 11                          | 14     | 11     | 12     | 14     | 13     | 11     | 11     | 0.091  |         |
| T50                    | 27         | 24        | 24     | 0.336  | 27      | 20                          | 29     | 24     | 20     | 32     | 25     | 23     | 25     | 0.157  |         |
| T75                    | 61         | 56        | 58     | 0.520  | 69      | 48                          | 67     | 53     | 44     | 73     | 55     | 59     | 57     | 0.080  |         |
| T80                    | 76         | 69        | 72     | 0.501  | 86      | 59                          | 83     | 65     | 55     | 90     | 67     | 74     | 70     | 0.059  |         |

|                 |              |      |      |      |       |      |      |      |      |      |      |      |      |      |                   |
|-----------------|--------------|------|------|------|-------|------|------|------|------|------|------|------|------|------|-------------------|
| <b>T90</b>      |              | 128  | 116  | 123  | 0.365 | 138  | 105  | 139  | 114  | 101  | 146  | 118  | 122  | 117  | 0.082             |
| <b>T95</b>      |              | 173  | 163  | 171  | 0.367 | 180  | 155  | 183  | 162  | 155  | 185  | 170  | 166  | 164  | 0.236             |
| <b>Slope</b>    |              | 394  | 501  | 523  | 0.117 | 511  | 465  | 678  | 339  | 454  | 742  | 72   | 535  | 460  | <b>0.001</b>      |
| <b>Linalool</b> |              |      |      |      |       |      |      |      |      |      |      |      |      |      |                   |
|                 | <b>1</b>     | 63   | 68   | 67   | 0.412 | 63   | 65   | 73   | 62   | 63   | 77   | 59   | 61   | 71   | 0.140             |
|                 | <b>2</b>     | 62   | 60   | 57   | 0.368 | 56   | 60   | 64   | 59   | 57   | 58   | 55   | 66   | 62   | 0.530             |
|                 | <b>3</b>     | 56   | 55   | 55   | 0.978 | 53   | 51   | 60   | 52   | 53   | 58   | 53   | 61   | 58   | 0.302             |
|                 | <b>4</b>     | 54   | 56   | 55   | 0.607 | 60   | 53   | 59   | 51   | 60   | 60   | 46   | 57   | 49   | <b>0.045</b>      |
|                 | <b>1</b>     | 2478 | 2668 | 2761 | 0.480 | 1500 | 4192 | 3734 | 1714 | 495  | 4383 | 1056 | 2429 | 3743 | <b>&lt; 0.001</b> |
|                 | <b>2</b>     | 1957 | 1528 | 1670 | 0.242 | 747  | 2683 | 1694 | 786  | 784  | 2358 | -    | 1893 | 1727 | <b>0.004</b>      |
|                 | <b>3</b>     | 1360 | 1353 | 1333 | 0.990 | 692  | 1599 | 2113 | 421  | -    | 1727 | -    | 1555 | 1274 | <b>0.016</b>      |
|                 | <b>4</b>     | 912  | 1075 | 1204 | 0.265 | 439  | 1158 | 1616 | -    | 1315 | 1241 | -    | 1260 | 885  | <b>0.031</b>      |
|                 | <b>Total</b> | 7197 | 6105 | 7323 | 0.367 | 3378 | 9631 | 7732 | 3092 | 3054 | 9710 | -    | 6601 | 7628 | <b>0.006</b>      |
|                 | <b>1</b>     | 38   | 51   | 50   | 0.209 | 43   | 44   | 59   | 75   | 33   | 45   | 7    | 39   | 49   | 0.064             |
|                 | <b>2</b>     | 27   | 22   | 21   | 0.028 | 22   | 28   | 21   | 28   | 22   | 24   | 12   | 31   | 22   | <b>0.005</b>      |
|                 | <b>3</b>     | 34   | 25   | 25   | 0.626 | 22   | 17   | 22   | 49   | 39   | 18   | 49   | 23   | 17   | 0.567             |
|                 | <b>4</b>     | 25   | 36   | 28   | 0.568 | 13   | 12   | 16   | 56   | 48   | 13   | 89   | 16   | 11   | <b>0.012</b>      |

|                                  | Time (min)   | Wine type |       |       |              | Interindividual differences |        |        |       |       |        |      |       |        | p-value           |
|----------------------------------|--------------|-----------|-------|-------|--------------|-----------------------------|--------|--------|-------|-------|--------|------|-------|--------|-------------------|
|                                  |              | WC        | WE    | WP    | P-value      | S1                          | S2     | S3     | S4    | S5    | S6     | S7   | S8    | S9     |                   |
| <b>T25</b>                       |              | 23        | 22    | 23    | 0.987        | 19                          | 33     | 29     | 14    | 5     | 34     | 14   | 26    | 28     | <b>0.014</b>      |
| <b>T50</b>                       |              | 47        | 54    | 53    | 0.495        | 56                          | 69     | 64     | 34    | 13    | 68     | 32   | 72    | 56     | <b>0.002</b>      |
| <b>T75</b>                       |              | 97        | 105   | 105   | 0.720        | 130                         | 130    | 128    | 62    | 33    | 133    | 51   | 134   | 119    | <b>0.001</b>      |
| <b>T80</b>                       |              | 108       | 121   | 122   | 0.487        | 149                         | 146    | 141    | 76    | 41    | 154    | 59   | 151   | 134    | <b>0.001</b>      |
| <b>T90</b>                       |              | 134       | 160   | 156   | 0.258        | 182                         | 184    | 180    | 102   | 64    | 192    | 77   | 188   | 179    | <b>0.001</b>      |
| <b>T95</b>                       |              | 153       | 183   | 175   | 0.217        | 203                         | 210    | 204    | 120   | 72    | 217    | 92   | 205   | 209    | <b>0.000</b>      |
| <b>Slope</b>                     |              | 16        | 19    | 19    | 0.469        | 12                          | 24     | 30     | 7     | 9     | 26     | 7    | 29    | 20     | <b>0.006</b>      |
| <b><math>\beta</math>-ionone</b> |              |           |       |       |              |                             |        |        |       |       |        |      |       |        |                   |
|                                  | <b>1</b>     | 138       | 150   | 157   | 0.307        | 106                         | 193    | 224    | 130   | 101   | 227    | 48   | 108   | 201    | <b>&lt; 0.001</b> |
|                                  | <b>2</b>     | 119       | 109   | 125   | 0.165        | 86                          | 156    | 167    | 100   | 88    | 173    | 41   | 99    | 150    | <b>&lt; 0.001</b> |
|                                  | <b>3</b>     | 97        | 91    | 100   | 0.307        | 71                          | 119    | 136    | 85    | 74    | 127    | 39   | 96    | 118    | <b>&lt; 0.001</b> |
|                                  | <b>4</b>     | 83        | 79    | 91    | 0.088        | 66                          | 101    | 119    | 67    | 66    | 111    | 41   | 88    | 101    | <b>&lt; 0.001</b> |
|                                  | <b>1</b>     | 27667     | 29761 | 33168 | 0.307        | 17467                       | 44962  | 53765  | 22506 | 15825 | 53067  | 3000 | 15207 | 45990  | <b>&lt; 0.001</b> |
|                                  | <b>2</b>     | 20709     | 19407 | 22546 | 0.288        | 10992                       | 32106  | 35199  | 14664 | 10076 | 36966  | 1721 | 13995 | 32268  | <b>&lt; 0.001</b> |
|                                  | <b>3</b>     | 14861     | 14278 | 16079 | 0.626        | 7351                        | 22196  | 25615  | 8827  | 7232  | 25213  | 953  | 12056 | 21768  | <b>&lt; 0.001</b> |
|                                  | <b>4</b>     | 12261     | 10698 | 12818 | 0.361        | 5242                        | 16875  | 22325  | 6032  | 4646  | 17801  | 1261 | 9276  | 17060  | <b>&lt; 0.001</b> |
|                                  | <b>Total</b> | 74135     | 71206 | 84612 | 0.210        | 41052                       | 116140 | 136903 | 52029 | 37779 | 133047 | 5287 | 50534 | 117086 | <b>&lt; 0.001</b> |
|                                  | <b>1</b>     | 41        | 49    | 39    | 0.268        | 45                          | 38     | 40     | 42    | 41    | 40     | 72   | 30    | 39     | 0.112             |
|                                  | <b>2</b>     | 29        | 28    | 27    | <b>0.014</b> | 28                          | 28     | 26     | 29    | 27    | 28     | 34   | 28    | 28     | <b>&lt; 0.001</b> |
|                                  | <b>3</b>     | 18        | 18    | 19    | 0.658        | 17                          | 19     | 18     | 17    | 19    | 19     | 11   | 24    | 19     | <b>0.039</b>      |
|                                  | <b>4</b>     | 14        | 14    | 15    | 0.585        | 11                          | 15     | 16     | 12    | 13    | 13     | 11   | 18    | 15     | 0.212             |
|                                  | <b>T25</b>   | 48        | 46    | 50    | 0.494        | 43                          | 58     | 55     | 48    | 39    | 55     | 29   | 51    | 54     | <b>0.005</b>      |
|                                  | <b>T50</b>   | 88        | 85    | 90    | 0.539        | 80                          | 98     | 94     | 86    | 79    | 95     | 58   | 103   | 95     | <b>0.005</b>      |
|                                  | <b>T75</b>   | 146       | 139   | 148   | 0.391        | 134                         | 155    | 155    | 139   | 145   | 151    | 106  | 161   | 152    | <b>0.005</b>      |
|                                  | <b>T80</b>   | 159       | 153   | 162   | 0.369        | 148                         | 169    | 169    | 153   | 160   | 166    | 117  | 174   | 166    | <b>0.005</b>      |
|                                  | <b>T90</b>   | 187       | 187   | 199   | 0.277        | 181                         | 201    | 201    | 191   | 195   | 199    | 149  | 204   | 200    | <b>0.029</b>      |
|                                  | <b>T95</b>   | 205       | 208   | 217   | 0.312        | 202                         | 220    | 220    | 213   | 216   | 218    | 165  | 219   | 219    | <b>0.028</b>      |
|                                  | <b>Slope</b> | 217       | 180   | 234   | 0.153        | 108                         | 311    | 396    | 122   | 105   | 349    | 15   | 180   | 307    | <b>&lt; 0.001</b> |

**Imax:** maximal intensity; **AUC:** area under the curve; **T25:** time to reach the 25% of total release; **T50:** time to reach the 50% of total release; **T75:** time to reach the 75% of total release; **T80:** time to reach the 80% of total release; **T90:** time to reach the 90% of total release; **T95:** time to reach the 95% of total release.
